# Supplementary material for: Association between Alzheimer’s disease genes and trajectories of cognitive function decline in Han Chinese in Taiwan
Source: publisher site journal article supplement (doi:10.18632/aging.203204), 2021-07-02
Supplement: Supplementary file [file aging-v13i13-203204-supplementary-material-SD1.pdf]

## SUPPLEMENTARY TABLES

**Supplementary Table 1. Effects of genetic markers on the age at the midpoint of cognitive function decline (*M*) and the rate of cognitive function decline (*R*) parameters based on the MMSE after adjusting for sex and education years (*n* = 283).**

| Covariates             | Minor allele | Regression coefficients on <i>M</i> |                 | Regression coefficients on <i>R</i> |                  |
|------------------------|--------------|-------------------------------------|-----------------|-------------------------------------|------------------|
|                        |              | Posterior mean                      | 95% CI          | Posterior mean                      | 95% CI           |
| Sex (female vs. male)  | —            | -1.02                               | (-2.93, 0.92)   | 0.64                                | (0.23, 1.11)*    |
| Education years        | —            | 0.39                                | (0.18, 0.61)*   | -0.04                               | (-0.09, -0.003)* |
| <i>APOE</i>            | ε4           | -2.10                               | (-3.79, -0.34)* | 0.90                                | (0.37, 1.42)*    |
| <i>ABCA7</i> rs3764650 | G            | -1.74                               | (-3.16, -0.29)* | -0.20                               | (-0.51, 0.13)    |
| <i>SORL1</i> rs3737529 | T            | 2.65                                | (0.41, 4.90)*   | 0.56                                | (0.01, 1.07)*    |
| <i>SORL1</i> rs1784933 | G            | 1.16                                | (-0.91, 3.22)   | 0.12                                | (-0.33, 0.52)    |
| <i>SORL1</i> rs2298813 | A            | 0.88                                | (-1.78, 3.61)   | -0.005                              | (-0.60, 0.71)    |
| <i>BINI</i> rs744373   | G            | -0.47                               | (-1.79, 0.86)   | -0.16                               | (-0.43, 0.11)    |
| <i>GAB2</i> rs2373115  | A            | -0.35                               | (-1.69, 0.99)   | 0.09                                | (-0.23, 0.40)    |
| <i>CD33</i> rs3865444  | A            | 1.32                                | (-0.34, 2.95)   | -0.05                               | (-0.41, 0.36)    |

Note: The subset of 255 AD and 28 MCI progression to AD patients were analyzed.

Abbreviations: MMSE, Mini-Mental State Examination; CI, credible interval.

\*Statistically significant with 95% credible interval.

**Supplementary Table 2. Model selection among the eight genetic markers after adjusting for sex and education years (*n* = 283).**

| Models  | Variables in the model                                                               | Posterior model probabilities |
|---------|--------------------------------------------------------------------------------------|-------------------------------|
| Model 1 | <i>APOE</i> , <i>SORL1</i> rs3737529                                                 | 0.8988                        |
| Model 2 | <i>APOE</i> , <i>ABCA7</i> rs3764650, <i>SORL1</i> rs3737529, <i>SORL1</i> rs1784933 | 0.0565                        |
| Model 3 | <i>APOE</i> , <i>SORL1</i> rs3737529, <i>CD33</i> rs3865444                          | 0.0216                        |
| Model 4 | <i>APOE</i> , <i>SORL1</i> rs3737529, <i>SORL1</i> rs1784933                         | 0.0131                        |
| Model 5 | <i>APOE</i> , <i>SORL1</i> rs3737529, <i>SORL1</i> rs2298813                         | 0.0066                        |
| Model 6 | <i>APOE</i> , <i>SORL1</i> rs3737529, <i>GAB2</i> rs2373115                          | 0.0024                        |
| Model 7 | <i>APOE</i> , <i>SORL1</i> rs3737529, <i>BINI</i> rs744373, <i>GAB2</i> rs2373115    | 0.0009                        |
| Model 8 | <i>APOE</i> , <i>SORL1</i> rs3737529, <i>BINI</i> rs744373                           | 0.0002                        |

Note: The subset of 255 AD and 28 MCI progression to AD patients were analyzed.

**Supplementary Table 3. Effects of *APOE* and *SORL1* rs3737529 on the age at the midpoint of cognitive function decline (*M*) and the rate of cognitive function decline (*R*) parameters based on the MMSE after Bayesian variable selection (*n* = 283).**

| Covariates             | Minor allele | Regression coefficients on <i>M</i> |                 | Regression coefficients on <i>R</i> |                |
|------------------------|--------------|-------------------------------------|-----------------|-------------------------------------|----------------|
|                        |              | Posterior mean                      | 95% CI          | Posterior mean                      | 95% CI         |
| Sex (female vs. male)  | —            | -0.89                               | (-2.88, 1.12)   | 0.59                                | (0.12, 1.12)*  |
| Education years        | —            | 0.40                                | (0.19, 0.62)*   | -0.04                               | (-0.09, 0.003) |
| <i>APOE</i>            | ε4           | -2.50                               | (-4.25, -0.73)* | 0.82                                | (0.37, 1.30)*  |
| <i>SORL1</i> rs3737529 | T            | 1.58                                | (0.01, 3.23)*   | 0.43                                | (0.06, 0.80)*  |

Note: The subset of 255 AD and 28 MCI progression to AD patients were analyzed.

Abbreviations: MMSE, Mini-Mental State Examination; CI, credible interval.

\*Statistically significant with 95% credible interval.

**Supplementary Table 4. Effects of genetic markers on the age at the midpoint of cognitive function decline (*M*) and the rate of cognitive function decline (*R*) parameters based on the MMSE after adjusting for sex and education years using the ADNI data (*n* = 385).**

| Covariates             | Minor allele | Regression coefficients on <i>M</i> |                 | Regression coefficients on <i>R</i> |                 |
|------------------------|--------------|-------------------------------------|-----------------|-------------------------------------|-----------------|
|                        |              | Posterior mean                      | 95% CI          | Posterior mean                      | 95% CI          |
| Sex (female vs. male)  | —            | -1.47                               | (-3.34, 0.39)   | -0.05                               | (-0.29, 0.18)   |
| Education years        | —            | -0.04                               | (-0.36, 0.28)   | -0.07                               | (-0.10, -0.03)* |
| <i>APOE</i>            | ε4           | -3.82                               | (-5.14, -2.44)* | -0.05                               | (-0.23, 0.13)   |
| <i>ABCA7</i> rs3764650 | G            | 1.35                                | (-0.55, 3.22)   | 0.09                                | (-0.18, 0.37)   |
| <i>SORL1</i> rs3737529 | T            | -1.67                               | (-5.06, 1.92)   | 0.16                                | (-0.44, 1.02)   |
| <i>SORL1</i> rs1784933 | G            | 1.68                                | (-1.24, 4.57)   | 0.11                                | (-0.30, 0.56)   |
| <i>SORL1</i> rs2298813 | A            | 2.19                                | (-0.62, 4.97)   | -0.14                               | (-0.44, 0.18)   |
| <i>BINI</i> rs744373   | G            | -0.13                               | (-1.50, 1.26)   | -0.14                               | (-0.32, 0.04)   |
| <i>GAB2</i> rs2373115  | A            | -0.39                               | (-1.94, 1.16)   | -0.07                               | (-0.26, 0.14)   |
| <i>CD33</i> rs3865444  | A            | 0.57                                | (-0.79, 1.95)   | 0.12                                | (-0.06, 0.31)   |

Note: The sample of 150 AD and 235 MCI progression to AD patients with at least four MMSE measurements were analyzed.

Abbreviations: MMSE, Mini-Mental State Examination; CI, credible interval.

\*Statistically significant with 95% credible interval.

**Supplementary Table 5. The TaqMan genotyping assay ID for the selected single nucleotide polymorphism (SNP).**

| <b>Gene</b>        | <b>SNP</b> | <b>TaqMan genotyping assay ID</b> |
|--------------------|------------|-----------------------------------|
| <i>APOE_e2/3/4</i> | rs429358   | C_3084793_20                      |
| <i>APOE_e2/3/4</i> | rs7412     | C_904973_10                       |
| <i>ABCA7</i>       | rs3764650  | C_27478162_20                     |
| <i>SORL1</i>       | rs3737529  | C_25803133_10                     |
| <i>SORL1</i>       | rs1784933  | C_8799397_10                      |
| <i>SORL1</i>       | rs2298813  | C_16190780_10                     |
| <i>BIN1</i>        | rs744373   | C_1042213_10                      |
| <i>GAB2</i>        | rs2373115  | C_12033202_20                     |
| <i>CD33</i>        | rs3865444  | C_1487395_40                      |
